# Supplementary material
Source: bioRxiv or medRxiv preprint supplement (https://medrxiv.org/highwire/filestream/90972/field_highwire_adjunct_files/0/2020.07.20.20155507-1.pdf)

## Supplementary Material

### Page:

- 1** **List of Online Materials**
- 2** **Table s1** Demographics
- 3** **Table s2** Clinical data on Hospitalized Subjects
- 4** **Figure s1** Proportional cell type breakdown across clinical phenotypes and time
- 5** **Figure s2** Dysregulated biological pathways in COVID-19.

**Table s1: Demographics of study population**

|                     | <b>COVID-19</b> | <b>Others</b> |
|---------------------|-----------------|---------------|
| <b>Gender:</b>      |                 |               |
| Male                | 24 (52%)        | 56 (51%)      |
| Female              | 22 (48%)        | 52 (49%)      |
| <b>Age (range):</b> |                 |               |
|                     | 45.8 (20-91)    | 29 (18-87)    |
| <b>Race, n (%)</b>  |                 |               |
| Native American     | 1 (2%)          | 2 (2%)        |
| Asian               | 6 (13%)         | 16 (15%)      |
| African American    | 10 (21%)        | 31 (29%)      |
| White               | 28 (61%)        | 54 (50%)      |
| Other               | 1 (2%)          | 5 (5%)        |

**Table s2: Clinical data on Hospitalized Subjects**

|                                             | <b>1</b>     | <b>2</b>                             | <b>3</b>                                                   | <b>4</b>                                    | <b>5</b>                     | <b>6</b>     | <b>7</b>                                 | <b>8</b>                                 | <b>9</b>                            | <b>10</b>                                                            | <b>11</b>                                 | <b>12</b>                                                           |
|---------------------------------------------|--------------|--------------------------------------|------------------------------------------------------------|---------------------------------------------|------------------------------|--------------|------------------------------------------|------------------------------------------|-------------------------------------|----------------------------------------------------------------------|-------------------------------------------|---------------------------------------------------------------------|
| <b>Age (years)</b>                          | 60           | 91                                   | 64                                                         | 76                                          | 69                           | 33           | 88                                       | 69                                       | 59                                  | 71                                                                   | 31                                        | 67                                                                  |
| <b>Sex</b>                                  | Male         | Female                               | Male                                                       | Male                                        | Male                         | Male         | Female                                   | Female                                   | Male                                | Male                                                                 | Female                                    | Male                                                                |
| <b>Race</b>                                 | Black        | Black                                | White                                                      | White                                       | Black                        | White        | Black                                    | Black                                    | Black                               | Black                                                                | Black                                     | Black                                                               |
| <b>Ethnicity</b>                            | Non-hispanic | Non-hispanic                         | Non-hispanic                                               | Non-hispanic                                | Non-hispanic                 | Non-hispanic | Non-hispanic                             | Non-hispanic                             | Non-hispanic                        | Non-hispanic                                                         | Unknown                                   | Non-hispanic                                                        |
| <b>Chronic medical conditions</b>           | CKD          | COPD, CAD, HTN, obesity, sleep apnea | aortic aneurysm, CAD, CVA, HTN, obesity, prior tobacco use | Asthma, CAD, diabetes, HTN, prostate cancer | CAD, CKD, CVA, diabetes, HTN | None         | CAD, CVA, HTN, obesity, pulmonary emboli | CVA, HTN, obesity, reactive airways, SLE | diabetes, HTN, obesity, sleep apnea | HTN, multiple sclerosis, post-traumatic stress disorder, tobacco use | Pregnancy, sleep apnea, prior tobacco use | Diabetes, heart failure, HTN, obesity, paraplegia, vascular disease |
| <b>Days of symptoms prior to enrollment</b> | 13           | 7                                    | 14                                                         | 3                                           | 2                            | 9            | 14                                       | 5                                        | 16                                  | 1                                                                    | 18                                        | 11                                                                  |
| <b>O2 at enrollment</b>                     | 0-1L         | 1-2L                                 | 0L                                                         | 0-2L                                        | 1-3L                         | 0-1L         | 0L                                       | 0L                                       | 1L                                  | 6L                                                                   | 50% FiO2                                  | 45% FiO2                                                            |
| <b>Initial therapy</b>                      | None         | Remdesivir                           | None                                                       | None                                        | HCQ/azithromycin             | HCQ          | None                                     | None                                     | Remdesivir                          | None                                                                 | HCQ, remdesivir, tocilizumab              | None                                                                |
| <b>Days on therapy prior to enrollment</b>  | --           | 1                                    | --                                                         | --                                          | 1                            | 0            | --                                       | --                                       | 3                                   | --                                                                   | 9                                         | --                                                                  |
| <b>Duration of hospitalization (days)</b>   | 3            | 11                                   | 3                                                          | 7                                           | 3                            | 1            | 21                                       | 3                                        | 8                                   | 13                                                                   | 43                                        | 42                                                                  |
| <b>ICU</b>                                  | No           | No                                   | No                                                         | No                                          | No                           | No           | No                                       | No                                       | Yes                                 | Yes                                                                  | Yes                                       | Yes                                                                 |
| <b>Mechanical Ventilation</b>               | No           | No                                   | No                                                         | No                                          | No                           | No           | No                                       | No                                       | No                                  | No                                                                   | Yes                                       | Yes                                                                 |
| <b>Deceased</b>                             | No           | Yes                                  | No                                                         | Yes                                         | Yes                          | No           | No                                       | No                                       | No                                  | No                                                                   | No                                        | No                                                                  |

CAD: coronary artery diseases, CKD: chronic kidney disease, COPD: chronic obstructive pulmonary disease, CVA: cerebrovascular accident, HTN: hypertension, SLE: systemic lupus erythematosus, HCQ: hydroxychloroquine

**Figure s1: Proportional cell type breakdown across clinical phenotypes and time**

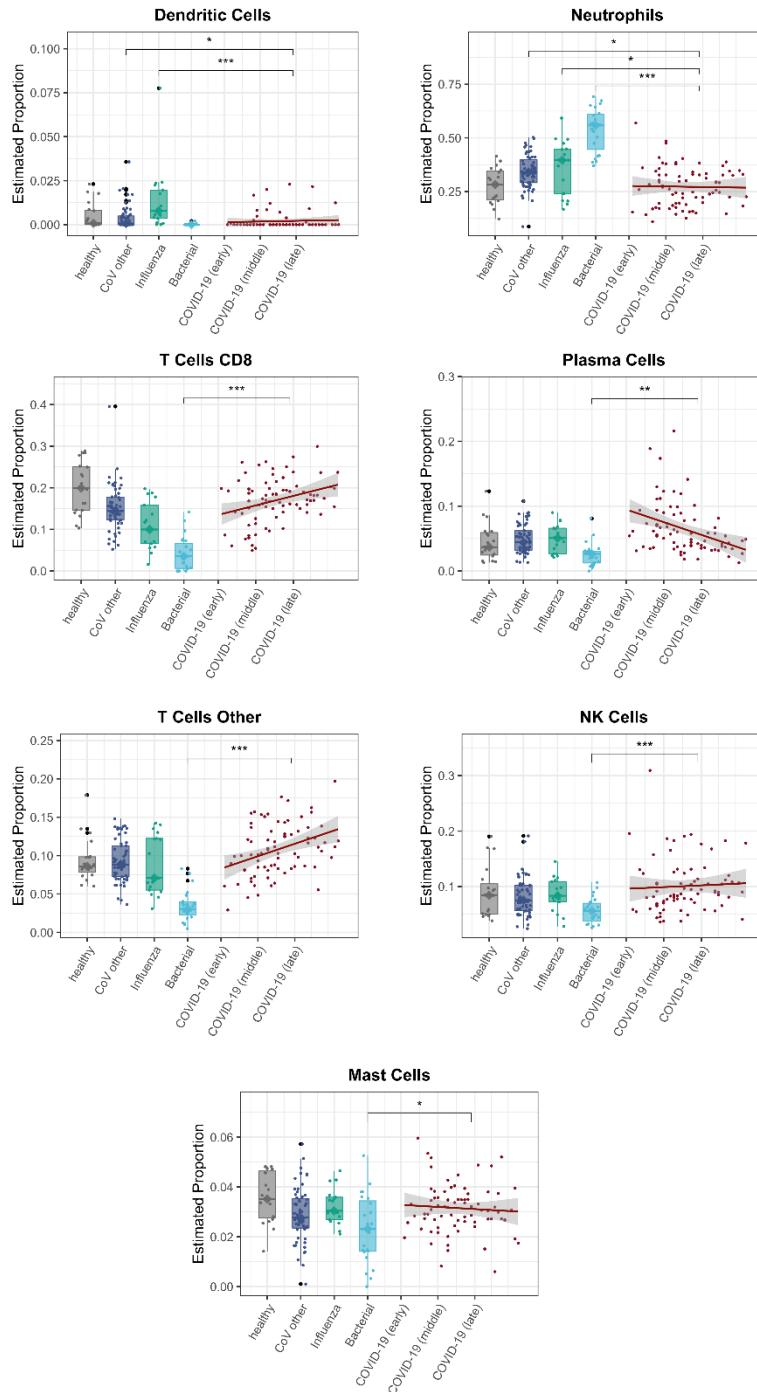

**Figure s2: Dysregulated biological pathways in COVID-19.** Log<sub>2</sub>FC change in the principle component of each biological pathway (A, color) demonstrates differences all COVID-19 and other viral infections, with p-values noted for each comparison. Changes in the principle component of relevant biological pathways in subjects with COVID-19 over time are also depicted (B).

**A**

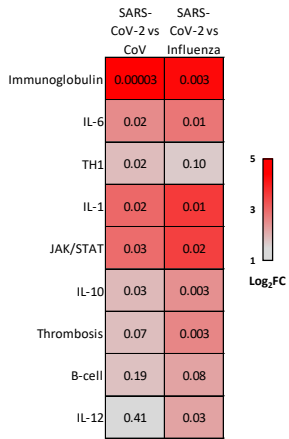

**B**

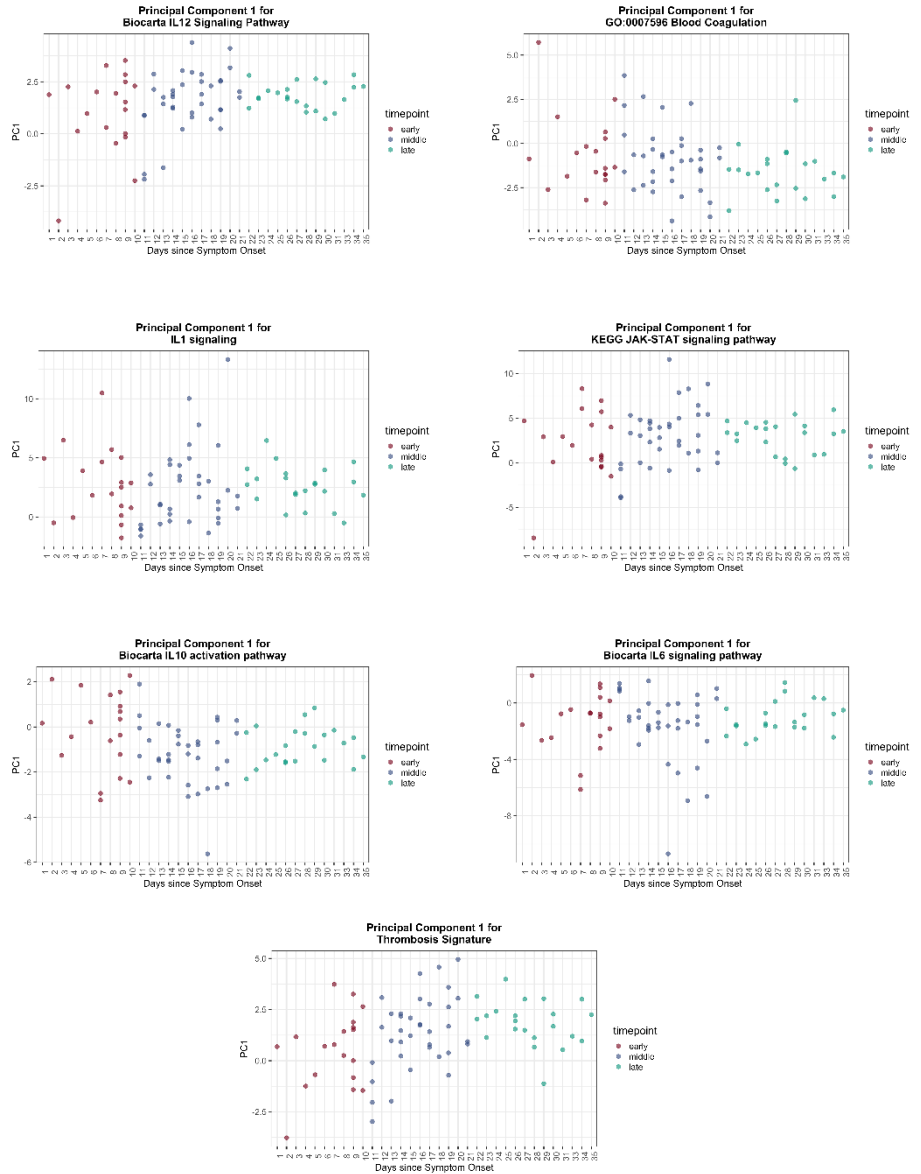

Supplement: Supplementary file [file 2020.07.20.20155507-1.pdf]
